# Supplementary material for: Do You See What I See? Longitudinal Associations Between Mothers’ and Adolescents’ Perceptions of Their Relationship and Adolescent Internalizing Symptoms
Source: Springer Nature journal article supplement (doi:10.1007/s10802-022-00975-5), 2022-09-17
Supplement: MOESM2 [file 23509530]

**Online Resource 2**

**Article title:** Do You See What I See? Longitudinal Associations Between Mothers' and Adolescents' Perceptions of Their Relationship and Adolescent Internalizing Symptoms

**Journal name:** *Research on Child and Adolescent Psychopathology*

**Author names:** Stefanie A. Nelemans, Stefanos Mastrotheodoros, Leyla Çiftçi, Wim Meeus & Susan Branje

**Affiliation and e-mail address of the corresponding author:** Stefanie A. Nelemans; Department of Youth and Family, Utrecht University, Utrecht, the Netherlands; s.a.nelemans@uu.nl

**Figure 2.1**

*Simplified Graphical Representation of the Higher-Order Factor-Analytical Part of the Latent Congruence Model, Distinguishing Between Mean-Levels of Conflict or Warmth in the Mother-Adolescent Relationship and Discrepancies Between Mothers and Adolescents in their Reports of Conflict or Warmth*

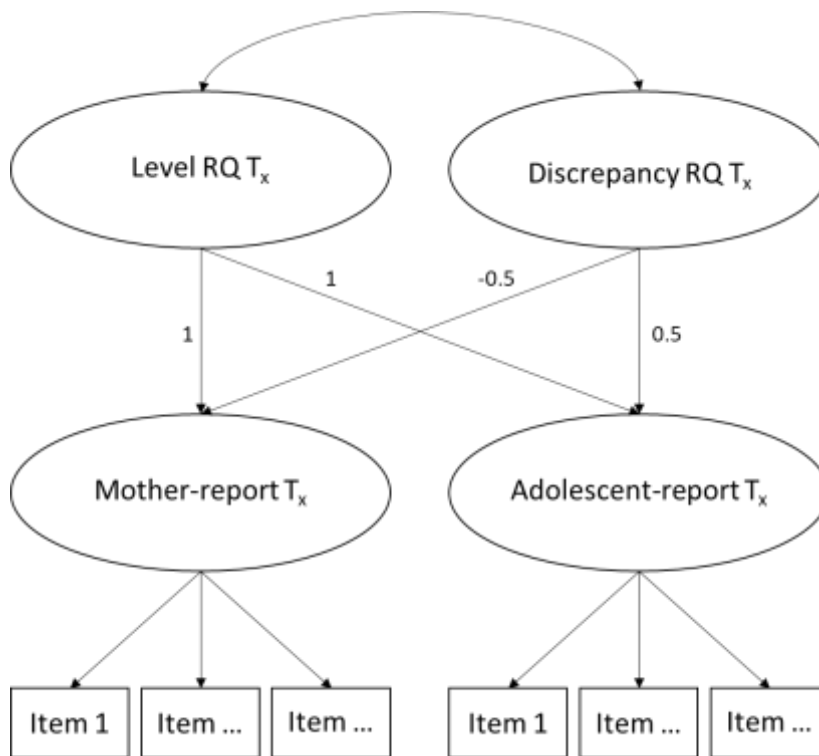

*Note.* RQ = mother-adolescent relationship quality (referring to either conflict or warmth in the mother-adolescent relationship)
