# Supplementary material for: Do You See What I See? Longitudinal Associations Between Mothers’ and Adolescents’ Perceptions of Their Relationship and Adolescent Internalizing Symptoms
Source: Springer Nature journal article supplement (doi:10.1007/s10802-022-00975-5), 2022-09-17
Supplement: MOESM3 [file 23509530]

### Online Resource 3

**Article title:** Do You See What I See? Longitudinal Associations Between Mothers' and Adolescents' Perceptions of Their Relationship and Adolescent Internalizing Symptoms

**Journal name:** *Research on Child and Adolescent Psychopathology*

**Author names:** Stefanie A. Nelemans, Stefanos Mastrotheodoros, Leyla Çiftçi, Wim Meeus & Susan Branje

**Affiliation and e-mail address of the corresponding author:** Stefanie A. Nelemans; Department of Youth and Family, Utrecht University, Utrecht, the Netherlands; s.a.nelemans@uu.nl

## Results

### Descriptive Statistics

**Table S3.1**

*Means and Standard Deviations of all Study Variables as well as Tests of Congruency Between Mother- and Adolescent-Reports of Conflict and Warmth in the Mother-Adolescent Relationship*

| Variable                        | Adolescent report               |      | Mother report |      | $\Delta M$ |     | $r$ |
|---------------------------------|---------------------------------|------|---------------|------|------------|-----|-----|
|                                 | $M$                             | $SD$ | $M$           | $SD$ | $M$        | $t$ |     |
|                                 | T <sub>1</sub> Ado DEP symptoms | 1.63 | 0.49          |      |            |     |     |
| T <sub>2</sub> Ado DEP symptoms | 1.50                            | 0.50 |               |      |            |     |     |
| T <sub>3</sub> Ado DEP symptoms | 1.53                            | 0.52 |               |      |            |     |     |
| T <sub>4</sub> Ado DEP symptoms | 1.56                            | 0.54 |               |      |            |     |     |
| T <sub>5</sub> Ado DEP symptoms | 1.54                            | 0.51 |               |      |            |     |     |
| T <sub>6</sub> Ado DEP symptoms | 1.59                            | 0.55 |               |      |            |     |     |
| T <sub>1</sub> Ado GAD symptoms | 1.39                            | 0.39 |               |      |            |     |     |
| T <sub>2</sub> Ado GAD symptoms | 1.32                            | 0.38 |               |      |            |     |     |

|                         |      |      |      |      |      |          |        |
|-------------------------|------|------|------|------|------|----------|--------|
| T <sub>3</sub> Ado GAD  | 1.36 | 0.43 |      |      |      |          |        |
| symptoms                |      |      |      |      |      |          |        |
| T <sub>4</sub> Ado GAD  | 1.39 | 0.44 |      |      |      |          |        |
| symptoms                |      |      |      |      |      |          |        |
| T <sub>5</sub> Ado GAD  | 1.37 | 0.44 |      |      |      |          |        |
| symptoms                |      |      |      |      |      |          |        |
| T <sub>6</sub> Ado GAD  | 1.42 | 0.47 |      |      |      |          |        |
| symptoms                |      |      |      |      |      |          |        |
| T <sub>1</sub> Conflict | 1.66 | 0.58 | 1.52 | 0.53 | 0.14 | 5.33***  | .45*** |
| T <sub>2</sub> Conflict | 1.71 | 0.67 | 1.55 | 0.54 | 0.16 | 5.93***  | .54*** |
| T <sub>3</sub> Conflict | 1.75 | 0.67 | 1.52 | 0.50 | 0.22 | 7.87***  | .50*** |
| T <sub>4</sub> Conflict | 1.79 | 0.69 | 1.55 | 0.56 | 0.25 | 7.86***  | .48*** |
| T <sub>5</sub> Conflict | 1.80 | 0.72 | 1.50 | 0.54 | 0.31 | 9.60***  | .49*** |
| T <sub>6</sub> Conflict | 1.74 | 0.65 | 1.48 | 0.54 | 0.26 | 9.15***  | .54*** |
| T <sub>1</sub> Warmth   | 4.39 | 0.55 | 3.96 | 0.51 | 0.43 | 14.22*** | .21*** |
| T <sub>2</sub> Warmth   | 4.30 | 0.61 | 3.91 | 0.50 | 0.39 | 13.00*** | .33*** |
| T <sub>3</sub> Warmth   | 4.22 | 0.66 | 3.95 | 0.50 | 0.26 | 7.81***  | .26*** |
| T <sub>4</sub> Warmth   | 4.14 | 0.68 | 3.94 | 0.53 | 0.20 | 6.04***  | .34*** |
| T <sub>5</sub> Warmth   | 4.17 | 0.69 | 3.92 | 0.53 | 0.24 | 7.00***  | .37*** |
| T <sub>6</sub> Warmth   | 4.13 | 0.73 | 3.96 | 0.55 | 0.16 | 4.53***  | .42*** |

*Note.* Ado = Adolescent; DEP = depressive; GAD = Generalized Anxiety Disorder.

All scores reflect averages across items, in which adolescent depressive symptoms could range from 1 to 4, adolescent GAD symptoms from 1 to 3, and both warmth and conflict in the mother-adolescent relationship from 1 to 5.

\*\*\*  $p < .001$ .

**Table S3.2**

*Summary of Concurrent Correlations Between Adolescent- and Mother-Reports on Conflict and Warmth in the Mother-adolescent Relationship and Adolescent Depressive and GAD Symptoms Across Time*

| Variable                                              | Ado DEP symptoms T <sub>1</sub> -<br>T <sub>6</sub> | Ado GAD symptoms T <sub>1</sub> -<br>T <sub>6</sub> |
|-------------------------------------------------------|-----------------------------------------------------|-----------------------------------------------------|
| Ado conflict T <sub>1</sub> -T <sub>6</sub>           | .29** – .37**                                       | .19** – .27**                                       |
| Ado warmth T <sub>1</sub> -T <sub>6</sub>             | -.21** – -.31**                                     | -.06 – -.16**                                       |
| Mother-report conflict T <sub>1</sub> -T <sub>6</sub> | .23** – .30**                                       | .11* – .20**                                        |
| Mother-report warmth T <sub>1</sub> -T <sub>6</sub>   | -.09 – -.16**                                       | -.09 – .02                                          |

*Note.* Ado = Adolescent-report; DEP = depressive; GAD = Generalized Anxiety

Disorder.

\*  $p < .05$ . \*\*  $p < .01$ .

### Sensitivity Analyses

Sensitivity analyses included adolescent gender as a time-invariant covariate of levels of mother-adolescent conflict or warmth, discrepancy in reports of mother-adolescent conflict or warmth, and adolescent depressive or GAD symptoms in the final LCMs. These models showed acceptable to good fit to the data for both adolescent depressive symptoms,  $\chi^2_{SB}(3161) = 5261.15$ , CFI = .920, RMSEA [90% CI] = .037 [.035, .038], SRMR = .085 and  $\chi^2_{SB}(2246) = 3558.52$ , CFI = .913, RMSEA [90% CI] = .034 [.032, .036], SRMR = .091, for conflict and warmth respectively, and adolescent GAD symptoms,  $\chi^2_{SB}(3161) = 5307.55$ , CFI = .919, RMSEA [90% CI] = .037 [.035, .039], SRMR = .084 and  $\chi^2_{SB}(2250) = 3579.87$ , CFI = .913, RMSEA [90% CI] = .034 [.032, .037], SRMR = .090, for conflict and warmth respectively.

Girls reported significantly higher levels of adolescent depressive symptoms,  $\beta_s = .21 - .25$ ,  $p < .001$ , and GAD symptoms,  $\beta_s = .22 - .26$ ,  $p < .001$ , than boys. Furthermore, mother-daughter dyads reported higher levels of warmth in their relationship,  $\beta_s = .08 - .13$ ,  $p \leq .001$ , and larger discrepancies in levels of warmth in their relationship, in which adolescents reported higher levels of warmth in comparison to their mothers,  $\beta_s = .07 - .08$ ,  $p = .032 - .049$ , than mother-son dyads. There were no significant gender differences in levels of mother-adolescent conflict,  $p = .731 - .736$ , or discrepancies in mother-adolescent conflict,  $p = .105 - .124$ . Importantly, including gender as a time-invariant covariate in the analyses did not affect any of the conclusions concerning associations between adolescent depressive or GAD symptoms and both levels and discrepancies in mother-adolescent conflict as well as mother-adolescent warmth.
